# Supplementary material for: Structure of the rabies virus glycoprotein trimer bound to a prefusion-specific neutralizing antibody
Source: PubMed Central journal article supplement — Sci Adv. 2022 Jun 17;8(24):eabp9151. doi: 10.1126/sciadv.abp9151 (PMC9205594; doi:10.1126/sciadv.abp9151), 2022-06-17
Supplement: sciadv.abp9151_sm.pdf [file sciadv.abp9151_sm.pdf]

Supplementary Materials for  
**Structure of the rabies virus glycoprotein trimer bound to a  
prefusion-specific neutralizing antibody**

Heather M. Callaway *et al.*

Corresponding author: Erica Ollmann Saphire, [erica@lji.org](mailto:erica@lji.org)

*Sci. Adv.* **8**, eabp9151 (2022)  
DOI: 10.1126/sciadv.abp9151

**The PDF file includes:**

Figs. S1 to S9  
Table S1  
Legend for movie S1

**Other Supplementary Material for this manuscript includes the following:**

Movie S1

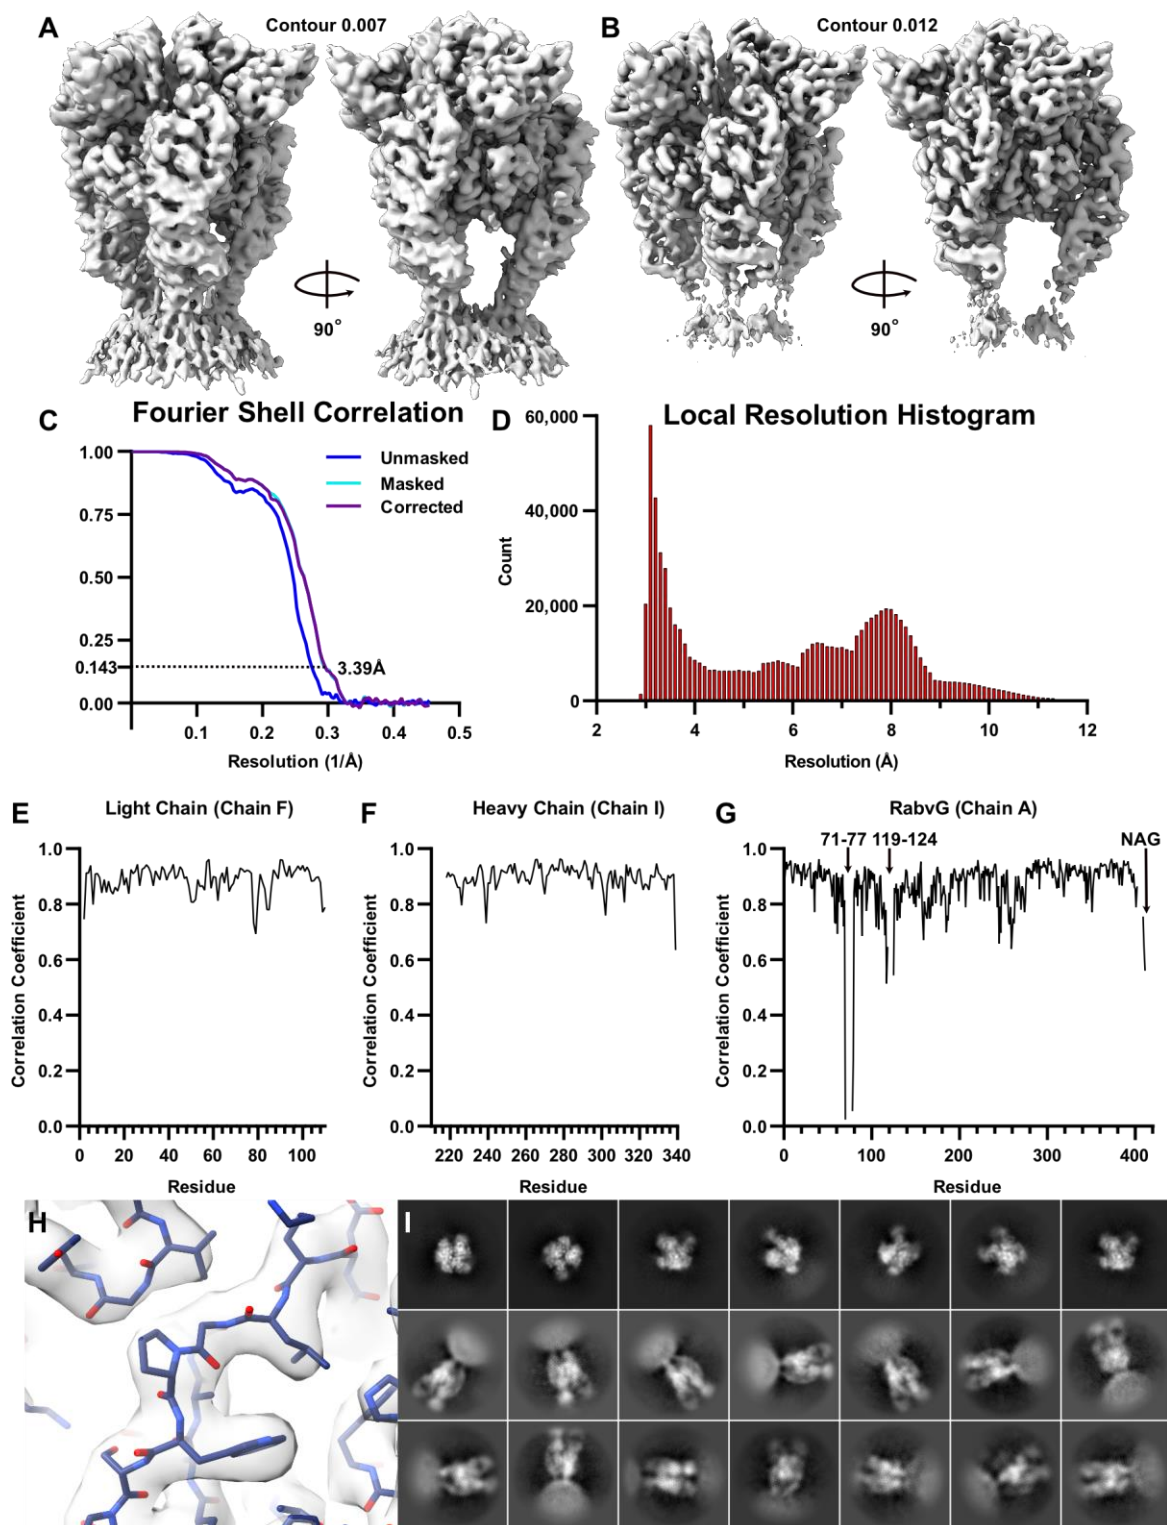

**Fig. S1. Additional information and statistics for the cryo-EM structure of RABV-G complexed with neutralizing antibody RVA122.** (A-B) Electron density maps at low (A) and high (B) contour levels. (C) Fourier Shell correlation curve. (D) Local resolution histogram. (E-G) Correlation coefficient graphs for the RVA122 light chain (E), RVA122 heavy chain (F), and

RABV-G (G). **(H)** Zoomed map showing the atomic model fit into electron density. **(I)** Representative 2D classes of cryo-EM particles used in 3D reconstruction.

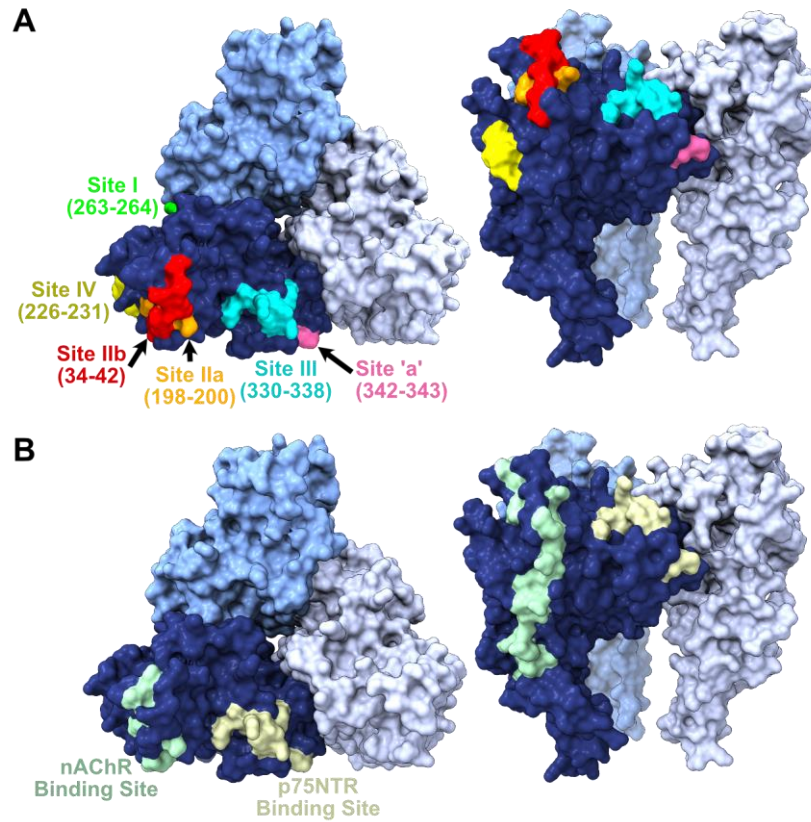

**Fig. S2. RABV-G antigenic sites and receptor binding sites. (A)** Known RABV-G antigenic sites mapped onto the trimeric RABV-G structure, with residue numbers indicated. **(B)** Approximate receptor binding sites for the nicotinic acetylcholine receptor (nAChR) and the p75 neurotrophin receptor (p75NTR).

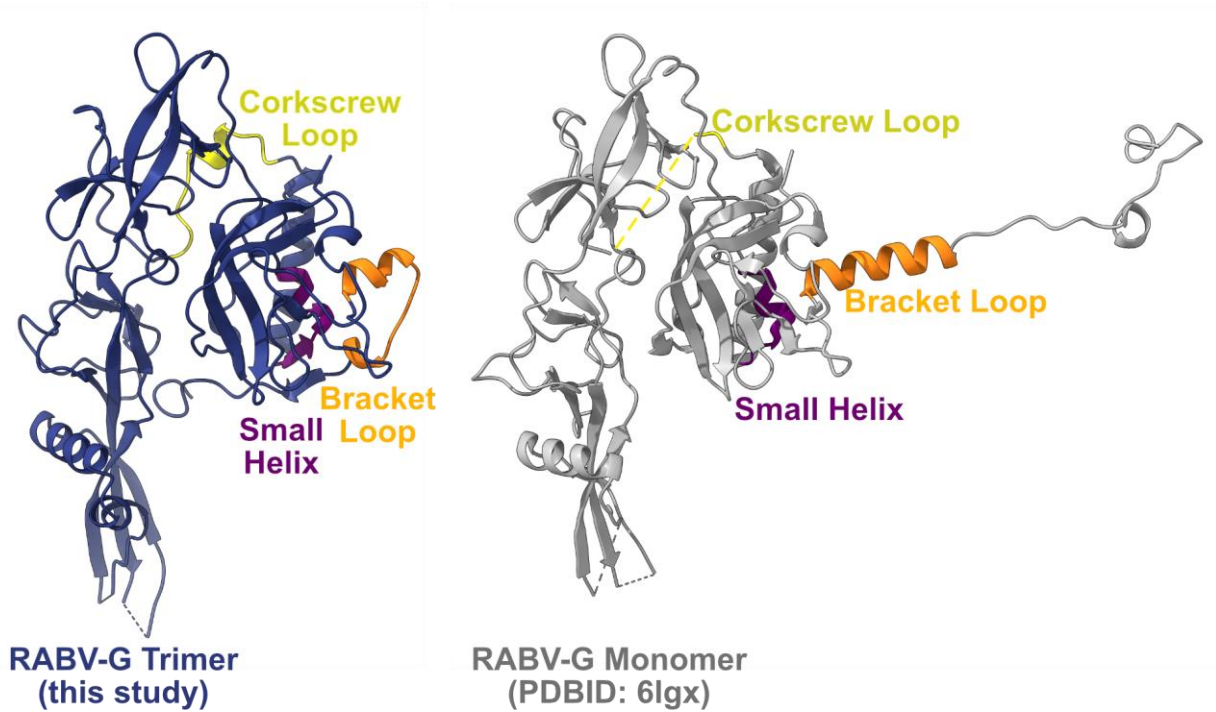

**Fig. S3. Pre-fusion RABV-G trimers and alternate pre-fusion RABV-G monomers have different conformations of loops at the trimeric interface.** Structure of one RABV-G protomer from this study (left) and a RABV-G monomer from a crystal structure (PDBID: 6lgx) (right), with the small helix (purple), corkscrew loop (yellow), and bracket loop (orange) marked.

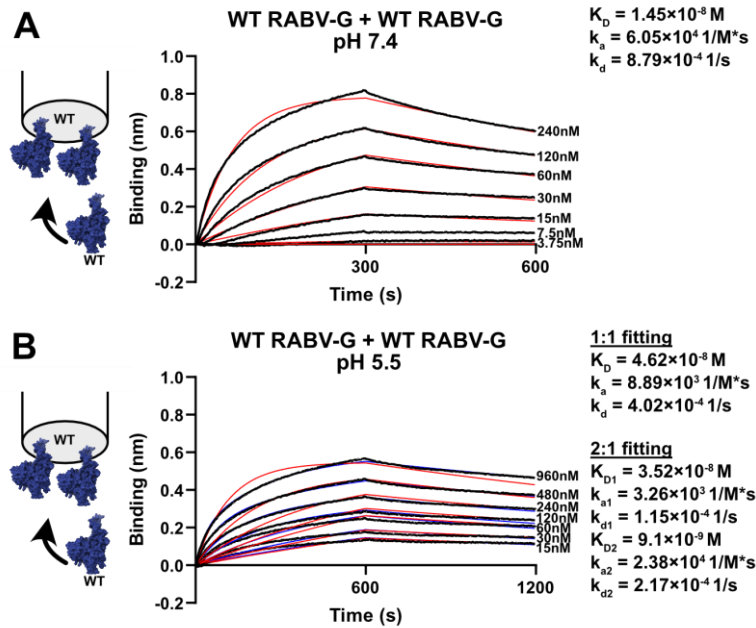

**Fig. S4. RABV-G soluble ectodomain binding kinetics.** Bio-layer interferometry measurements of RABV-G protomer binding at pH 7.4 (A) and pH 5.5 (B). 1:1 curve fitting (red, pH 7.4 and 5.5) and 2:1 curve fitting (blue, pH 5.5 only) are shown. Curves were fitted using the Octet Data Analysis HT software version 11, with global fitting and either a 1:1 fitting model (A) or both 1:1 and 2:1 fitting models (B). Experiments were performed in duplicate.

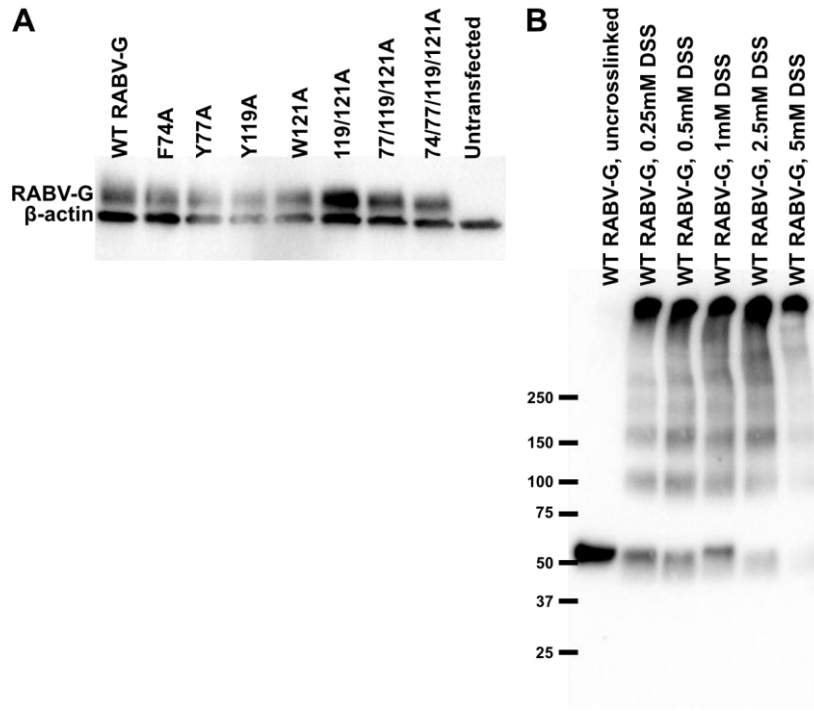

**Fig. S5. Expression of RABV-G soluble ectodomains and use of an alternate crosslinker. A)** Western blot showing total protein expression levels of RABV-G soluble ectodomains and  $\beta$ -actin (loading control) from lysed cells. **B)** Wild-type RABV-G ectodomains crosslinked with 0.25-5mM DSS.

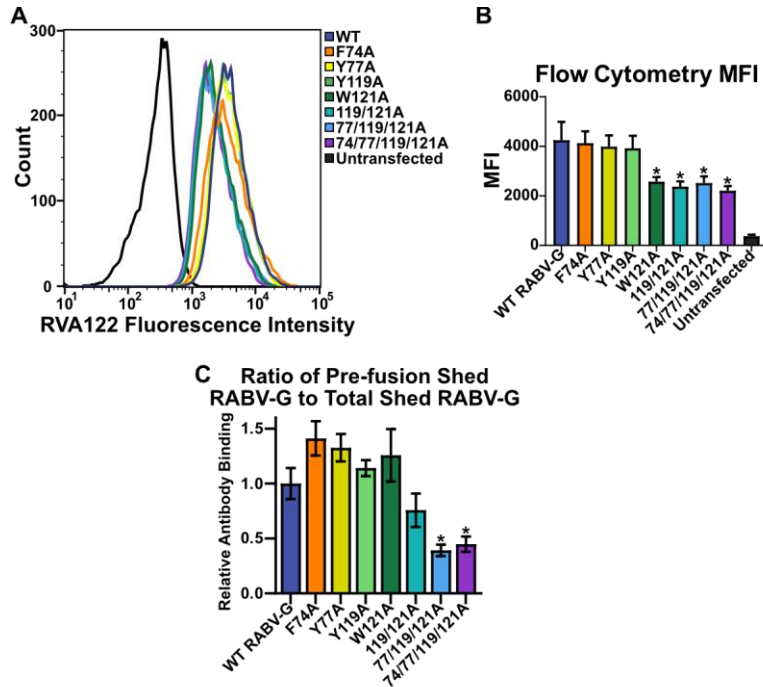

**Fig. S6. Fusion loop point mutants affect protein conformation and shedding for full-length RABV-G.** (A-B) Flow cytometry quantifying the level of surface-expressed, full-length RABV-G in the pre-fusion conformation. (C) Ratio of pre-fusion shed RABV-G to total shed RABV-G in an ELISA quantifying shed RABV-G. Statistical significance of differences were analyzed using ANOVA. Error bars indicate SEM for three biological replicates. \*  $p < 0.05$ ; \*\*  $p < 0.01$ .



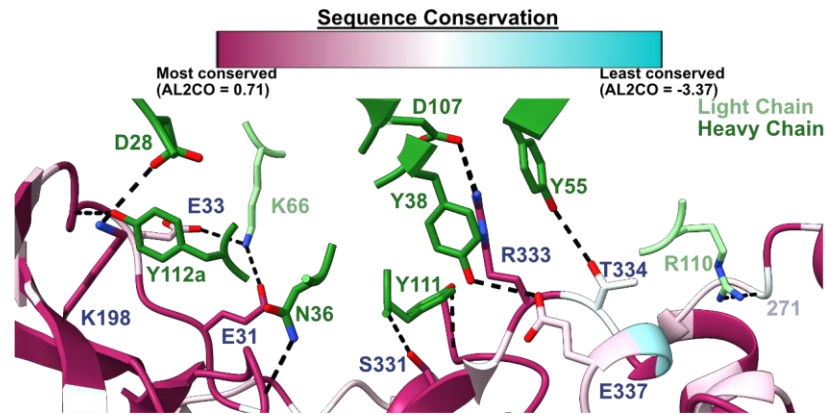

**Fig. S7. Sequence conservation among type 1 lyssaviruses at the RVA122 binding site.** A sequence alignment was created from European Bat Lyssaviruses 1 (YP\_001285391.1) and 2 (YP\_001285396.1), Khujand virus (YP\_009094330.1), Aravan Lyssavirus (YP\_007641395.1), Bokeloh Bat Lyssavirus (YP\_009091812.1), Duvenhage virus (NC\_020810.1), Irkut virus (AFP74571.1), and PV strain rabies virus (NC\_001542.1). ChimeraX 1.2.5 (39) was used to color RABV-G residues according to sequence conservation.

| Reference sequence nucleotide position | Nucleotide substitution | Amino Acid substitution (G gene) | P1 | P6   | P7   |
|----------------------------------------|-------------------------|----------------------------------|----|------|------|
| 4555                                   | C → A                   | P137Q                            | <2 | 78   | 96.6 |
| 5142                                   | C → A                   | R333S                            | <2 | 99.9 | 99.8 |

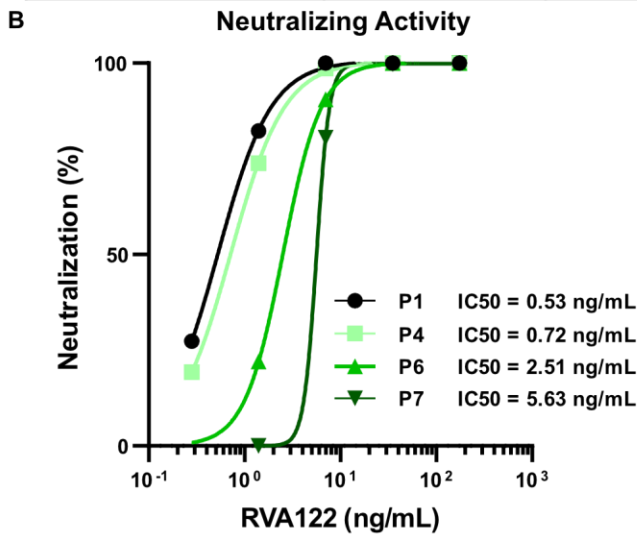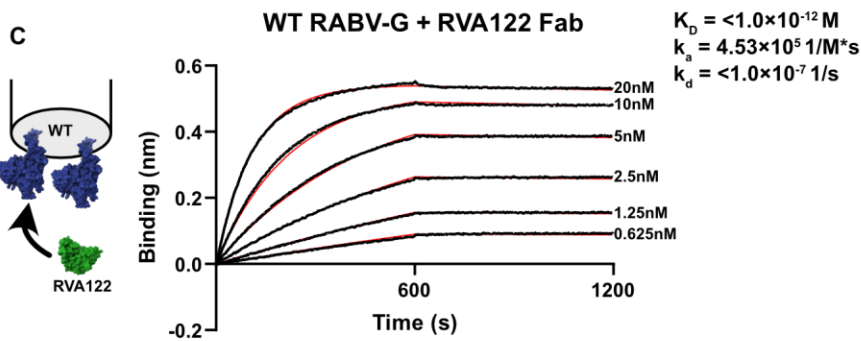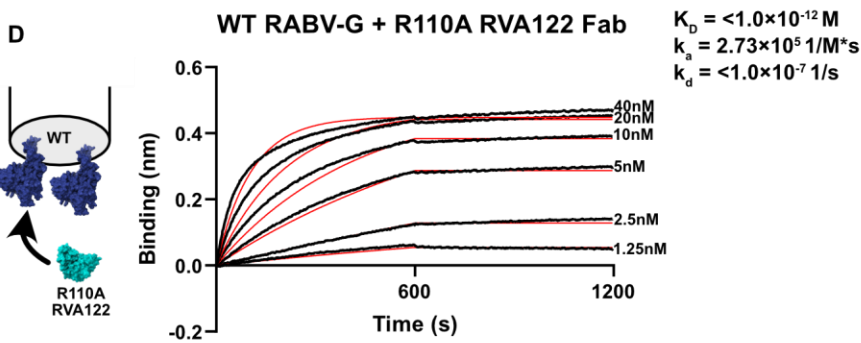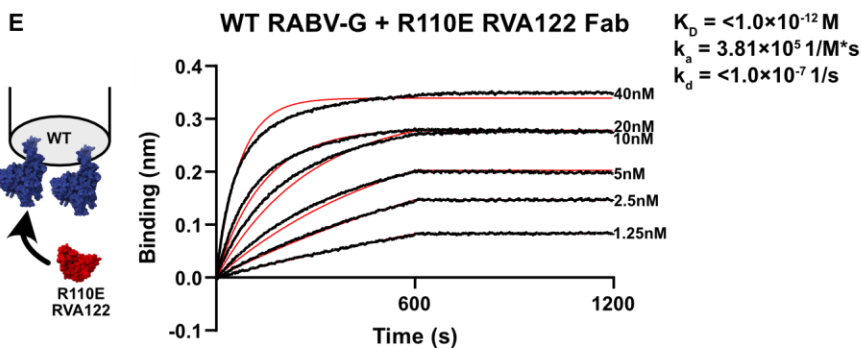

**Fig. S8. RABV-G escape mutations and the effect of RVA122 residue R110 on binding.** **A)** NGS sequencing of the escape mutant selected with RVA122. Nucleotide positions are from the Tha-GFP RABV reference sequence (EVAg collection Ref-SKU: 014V-03195). **B)** RVA122 neutralization on sequential passages of Tha-GFP RABV. The  $IC_{50}$  concentration for each passage was calculated using GraphPad Prism 9 (non-linear regression, best fit extrapolation). **(C-E)** Bio-layer interferometry measurements of binding kinetics between RABV-G and wild-type RVA122 Fab (C), R110A RVA122 Fab (D), and R110E RVA122 Fab (E). 1:1 curve fitting (red) is shown. Curves were fitted using the Octet Data Analysis HT software version 11, with global fitting and a 1:1 fitting model. Experiments were performed in duplicate.

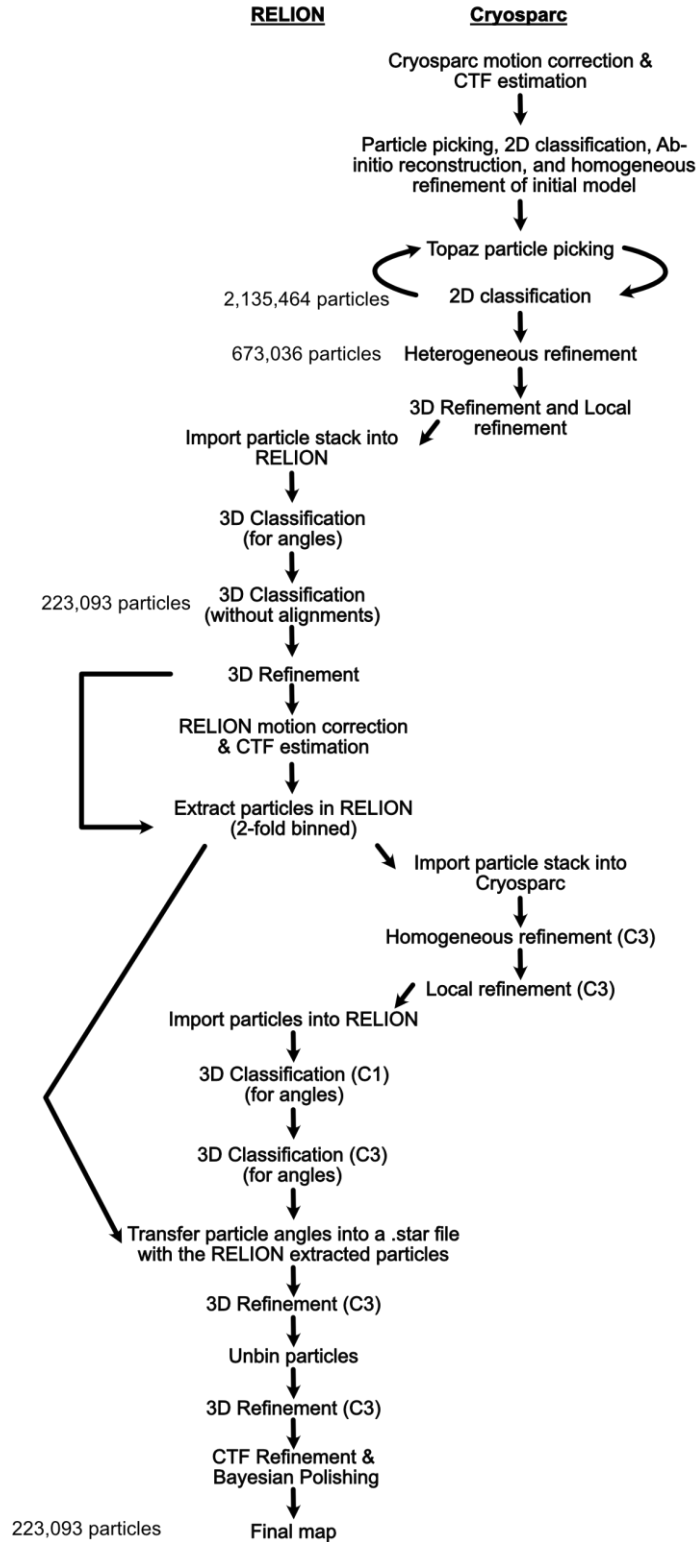

**Fig. S9. Supplemental Figure 9. Cryo-EM data processing method for the high-resolution RABV-G/RVA122 complex.**

|                                                  | High Resolution       | Low Resolution         |                        |                        |
|--------------------------------------------------|-----------------------|------------------------|------------------------|------------------------|
|                                                  | RABV-G/RVA122 Complex | RABV-G/RVA122 Complex  |                        |                        |
|                                                  |                       | 3 engaged fusion loops | 2 engaged fusion loops | 0 engaged fusion loops |
| <b>Map Statistics</b>                            |                       |                        |                        |                        |
| Movies                                           | 6,305                 | 1,969                  |                        |                        |
| Particles                                        | 223,092               | 9,627                  | 32,409                 | 10,144                 |
| B-factor                                         | 140.5                 | 299.9                  | 256.7                  | 382.7                  |
| Resolution (Å)                                   | 3.39                  | 7.05                   | 5.71                   | 6.92                   |
| Box size (px)                                    | 256                   | 256                    |                        |                        |
| Pixel size (Å/px)                                | 1.1                   | 1.15                   |                        |                        |
| Microscope                                       | Titan Krios           | Talos Arctica          |                        |                        |
| Detector                                         | Gatan K3              | Gatan K2               |                        |                        |
| Total dose (e <sup>-</sup> /Å <sup>2</sup> )     | 50                    | 26.74                  |                        |                        |
| Frames                                           | 50                    | 55                     |                        |                        |
| Dose per frame (e <sup>-</sup> /Å <sup>2</sup> ) | 1                     | 0.49                   |                        |                        |
| <b>Molprobrity statistics</b>                    |                       |                        |                        |                        |
| All-atom clashscore                              | 5.16                  |                        |                        |                        |
| Ramachandran plot:                               |                       |                        |                        |                        |
| Outliers                                         | 0.00%                 |                        |                        |                        |
| Allowed                                          | 3.11%                 |                        |                        |                        |
| Favored                                          | 96.89%                |                        |                        |                        |
| Cbeta outliers                                   | 0.00%                 |                        |                        |                        |
| Rotamer outliers                                 | 0.00%                 |                        |                        |                        |
| Peptide plane:                                   |                       |                        |                        |                        |
| Cis-proline                                      | 0.00%                 |                        |                        |                        |
| Cis-general                                      | 0.00%                 |                        |                        |                        |
| Twisted proline                                  | 0.00%                 |                        |                        |                        |
| Twisted general                                  | 0.00%                 |                        |                        |                        |

**Table S1. CryoEM map and model statistics.**

**Movie S1. 3D variability analysis of RABV-G fusion loops.**
